# Supplementary material for: Distributed Acoustic Sensing for Seismic Monitoring of The Near Surface: A Traffic-Noise Interferometry Case Study
Source: PubMed Central journal article supplement (PMC5599533; doi:10.1038/s41598-017-11986-4), 2017-09-14
Supplement: 41598_2017_11986_MOESM1_ESM.pdf [file 41598_2017_11986_MOESM1_ESM.pdf]

1                                   **Supplementary Information for:**

2                   **Distributed Acoustic Sensing for Seismic Monitoring**  
3                   **of The Near Surface: A Traffic-Noise Interferometry**  
4                   **Case Study**

5  
6   **Shan Dou<sup>1,+</sup>, Nate Lindsey<sup>1,2,+</sup>, Anna M. Wagner<sup>3</sup>, Thomas M. Daley<sup>1</sup>,**  
7   **Barry Freifeld<sup>1</sup>, Michelle Robertson<sup>1</sup>, John Peterson<sup>1</sup>, Craig Ulrich<sup>1</sup>,**  
8   **Eileen R. Martin<sup>4</sup>, Jonathan B. Ajo-Franklin<sup>1,\*</sup>**

9  
10   <sup>1</sup>Lawrence Berkeley National Laboratory, Energy Geosciences Division, Berkeley,  
11   94720, USA

12   <sup>2</sup>University of California, Berkeley, Department of Earth and Planetary Science,  
13   Berkeley, 94720, USA

14   <sup>3</sup>U.S. Army Cold Regions Research & Engineering Laboratory (CRREL), Alaska  
15   Research Office Fairbanks, Ft. Wainwright, 99703, USA

16   <sup>4</sup>Stanford University, Institute for Computational & Mathematical Engineering (ICME),  
17   Stanford, 94305, USA

18   \*JBAjo-Franklin@lbl.gov

19   <sup>+</sup>These authors contributed equally to this work

20

## 1 Influences of array orientations

2 As shown in Figure S1, traffic noise recorded by the road-parallel (east-west) and road-  
 3 perpendicular (north-south) arrays have distinctly different characteristics. Data from the road-  
 4 perpendicular array have steeper moveout and near-uniform dip direction in the time-offset domain. In the  
 5 frequency-wavenumber domain, the spectral peaks mostly reside in one quadrant and lean toward lower  
 6 apparent velocities ( $\sim 240$  m/s). Data from the road-parallel array constitute series of crisscrossed  
 7 hyperbolas that have flatter moveout and non-uniform dips in the time-offset domain. The corresponding  
 8 spectral peaks are present in quadrants of both positive and negative wavenumbers and cover a wide range  
 9 of apparent velocities ( $\sim 100$ – $1000$  m/s). The spread-out distributions of spectral peaks indicate that waves  
 10 recorded by the road-parallel array come from a variety of azimuths.  
 11

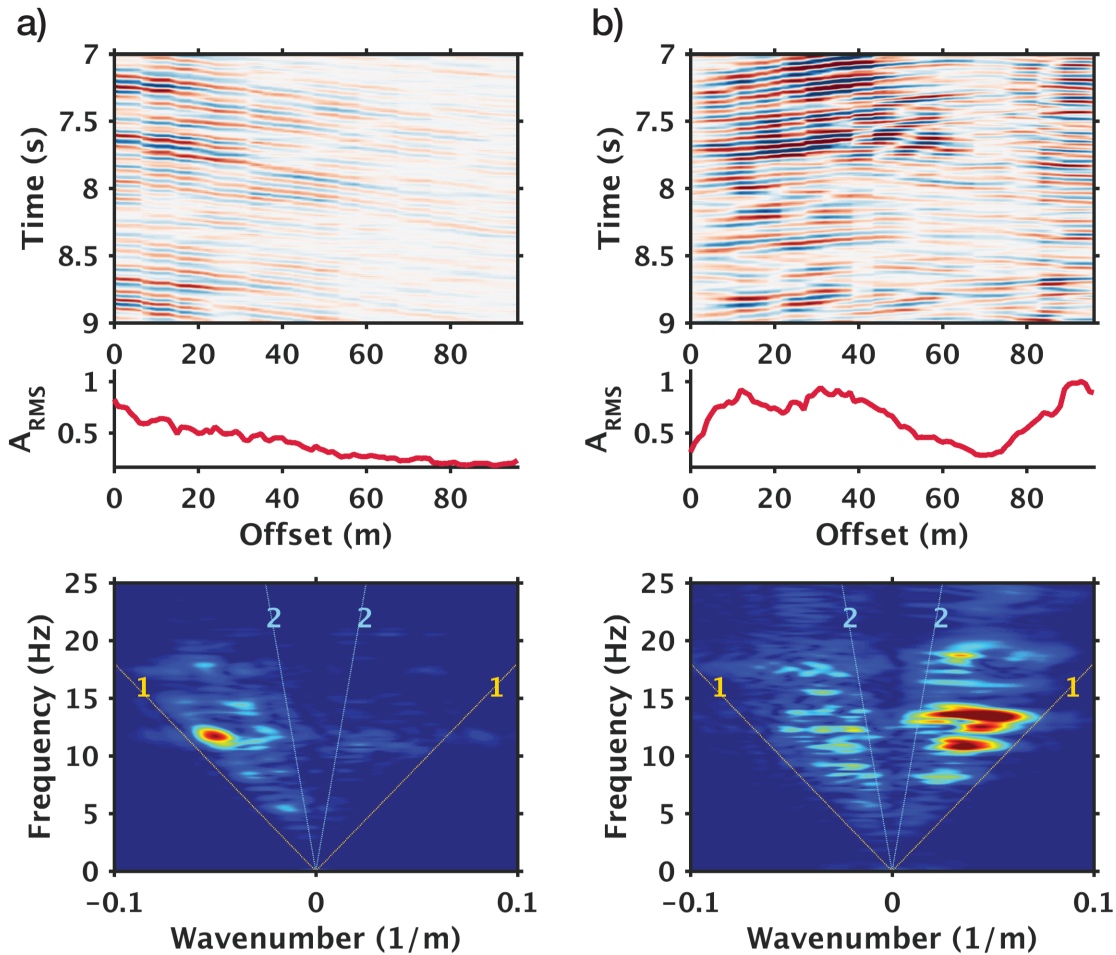

12 Figure S1. Comparisons of noise records between north-south (road-perpendicular) and east-west (road-  
 13 parallel) DAS arrays. Upper: time-offset displays; middle: amplitude-versus-offset trends; lower:  
 14 frequency-wavenumber spectra. (a) North-south array. (b) East-west array.  $A_{\text{RMS}}$  = root-mean-square (RMS)  
 15 amplitude computed over 1-minute time-window. In frequency-wavenumber spectra, yellow dotted lines  
 16 (denoted by 1) denote apparent velocity of 100 m/s; blue dotted lines (denoted by 2) denote apparent  
 17 velocity of 1000 m/s.  
 18

19  
 20 The appearances of noise recordings suggest that the road-parallel array is dominated by broadside  
 21 waves whereas the road-perpendicular array mainly records waves that travel along the axial direction of  
 22 the fiber. Such differences result from combined effects of geometric spreading and directional filtering.  
 23 To provide an intuitive explanation, we illustrate a simple example of P-wave propagation in Figure S2:

1 Regardless of array orientation, the directional filtering of DAS always leads to a  $\cos^2\theta$  scaling with  
 2 respect to waves' incident angle  $\theta$  (relative to the axial direction of the fiber)<sup>1</sup>. For the road-perpendicular  
 3 array, geometrical spreading yields an additional scaling of  $\cos\theta$ , which leads to a  $\cos^3\theta$  response that  
 4 peaks along the axial direction. As a result, waves that propagate along the axial direction will dominate  
 5 the DAS recordings. For the road-parallel array, geometrical spreading yields a factor of  $\sin\theta$ . Combined  
 6 with directional filtering, the resulting response of  $\sin\theta \cdot \cos^2\theta$  reaches zero at the axial direction and  
 7 maximizes at 35° incident angle. This explains the dominance of broadside waves on the road-parallel array.  
 8

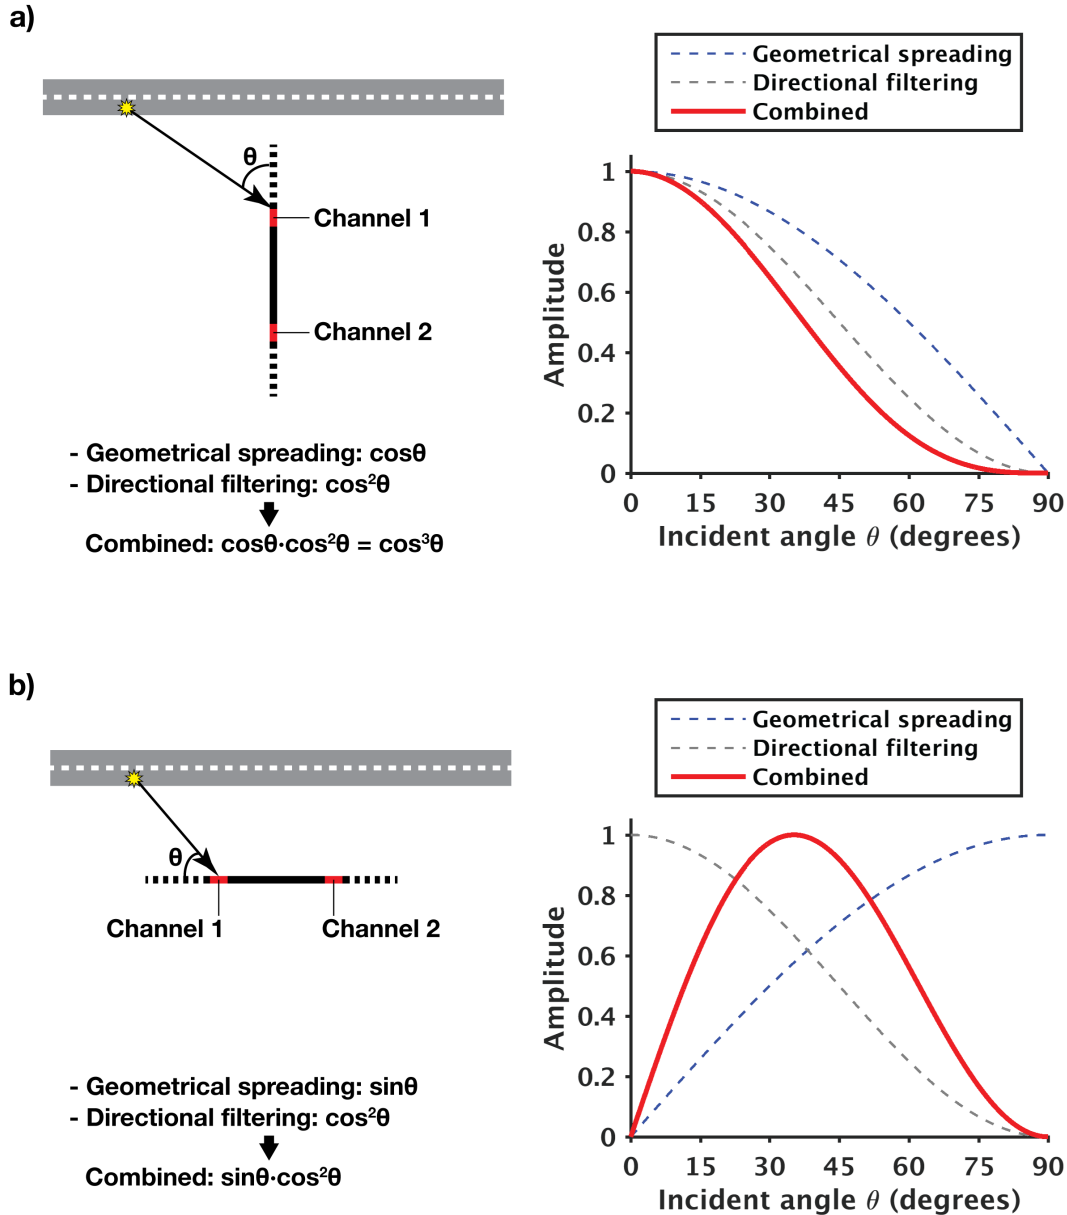

9  
 10 Figure S2. Schematic explanations on influences of DAS array orientations (not to scale). (a) Road-  
 11 perpendicular array. (b) Road-parallel array. Grey strip denotes road; yellow star denotes noise source  
 12 (vehicle); arrows denote wave propagation directions; channel 1 and 2 denotes two neighboring DAS  
 13 channels.

14

15 **Additional information on data-processing methods**

## 1 **Amplitude-versus-offset metric for data screening**

2 We devise a data-screening procedure based upon the expected power-law scaling between the  
3 RMS amplitudes of the noise records ( $A_{RMS}^{[i]}$ , where  $i$  is the channel index) and the offsets relative to the  
4 northernmost DAS channel ( $x^{[i]}$ ). We fit the observed  $A_{RMS}^{[i]}$  vs.  $x^{[i]}$  relationship to a power-law expression  
5  $A_{RMS}^{[i]<fit>} = a(x^{[i]})^c + b$ , where  $a$ ,  $b$ , and  $c$  are curve-fitting coefficients to be solved by minimizing the  
6 least-square misfit  $\sum_{i=1}^N (A_{RMS}^{[i]<fit>} - A_{RMS}^{[i]})^2$ . For our dataset, we found that  $c$  values close to  $-2$   
7 consistently yield high-quality surface waves. We also incorporate Pearson's correlation coefficient  $R$  to  
8 evaluate the goodness of fit. The closer  $R$  is to 1, the better the fit. Combining these two criteria, we  
9 construct a data-screening metric  $\zeta = |cR + 2|$ . Only when  $\zeta < 1$  do we accept a noise record for further  
10 processing..

## 11 **Pearson's correlation coefficient**

12 We use Pearson's correlation coefficient  $R$  to assess the goodness of fit. Assuming we have a total  
13 of  $N$  data points  $(x_i, y_i)$  ( $i = 1, 2, \dots, N$ ) and we have fitted these data to a curve described by function  
14  $y_i^{<fit>} = f(x_i)$ , we compute coefficient  $R$  via Equation S1 as shown below:  
15  
16

$$17 \quad R = \sqrt{\frac{SSR}{SSE+SSR}} \quad (S1)$$
$$SSR = \sum_i (y_i^{<fit>} - \bar{y})^2$$
$$SSE = \sum_i (y_i^{<fit>} - y_i)^2$$

18 where  $\bar{y} = \sum_{i=1}^N y_i / N$  denotes the mean value of data points  $y_i$ ;  $SSR$  denotes sum of squared  
19 residuals;  $SSE$  denotes sum of squared errors. The closer  $R$  is to 1, the better the fit.  
20  
21

## 22 **Effects of screening on data quality**

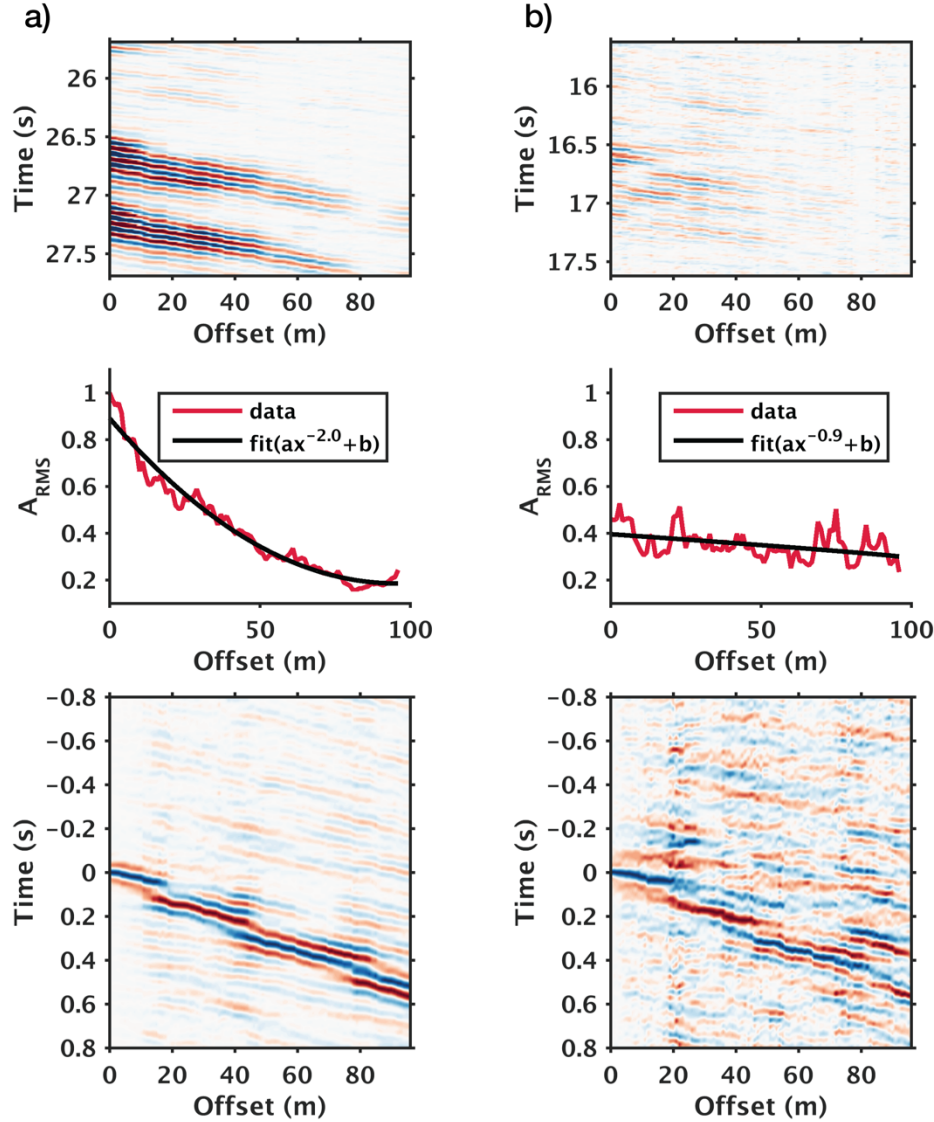

1  
2 Figure S3. Comparisons of accepted and rejected noise records. Upper: offset-time displays; middle:  
3 amplitude-versus-offset trends; lower: common virtual-shot gathers. (a) Accepted noise records. (b)  
4 Rejected noise records.  $A_{RMS}$  = root-mean-square (RMS) amplitude computed over 1-minute time-window;  
5  $x$  = offset in meters;  $a$  and  $b$  are curve-fitting parameters.  
6

7 We demonstrate the efficacy of screening on improving data quality in Figure S3. As an example,  
8 we compare common virtual-shot gathers obtained from accepted and rejected noise records. The quality  
9 of the gather obtained from the accepted noise record ( $R = 0.98$ ;  $c = -2$ ;  $\zeta = 0$ ) is clearly better than its  
10 counterpart ( $R = 0.43$ ;  $c = -0.9$ ;  $\zeta = 1.6$ ).  
11

### 12 **Correlation between hourly data rejection rates and traffic pattern**

13 The effectiveness of the data-screening procedure is also confirmed by the correlation between the  
14 hourly data rejection rate and the expected traffic pattern. As shown in Figure S4, lower rejection rates  
15 correspond to early morning and afternoon-evening rush hours; higher rejection rates correspond to quieter  
16 time such as mid- to late-morning, early afternoon, and post-midnight hours. Such correlation is to be  
17 expected, as the data-screening metric essentially measures whether or not vehicles are present near the  
18 array within each of the 1-minute time window. Therefore the busier the traffic, the lower the rejection rate.

1 The high rejection rate between 7 am and 8 am is unexpected. Its cause is presently unclear, as we did not  
 2 conduct independent observations of the traffic during the experiment.

a)

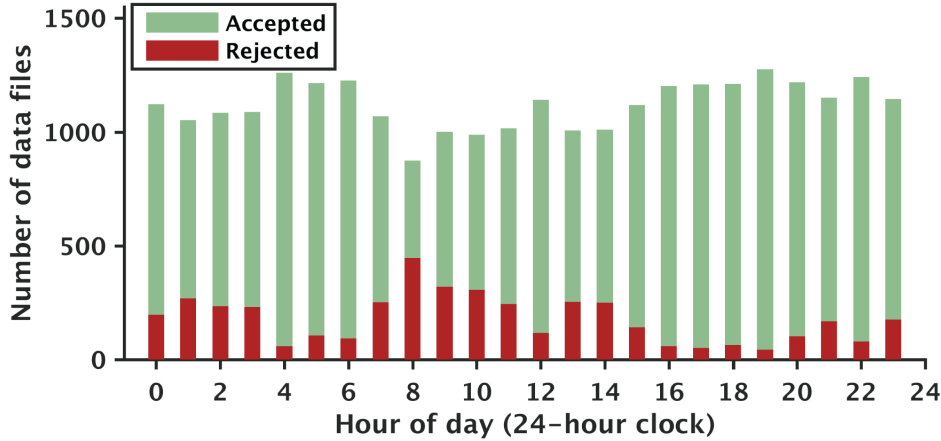

b)

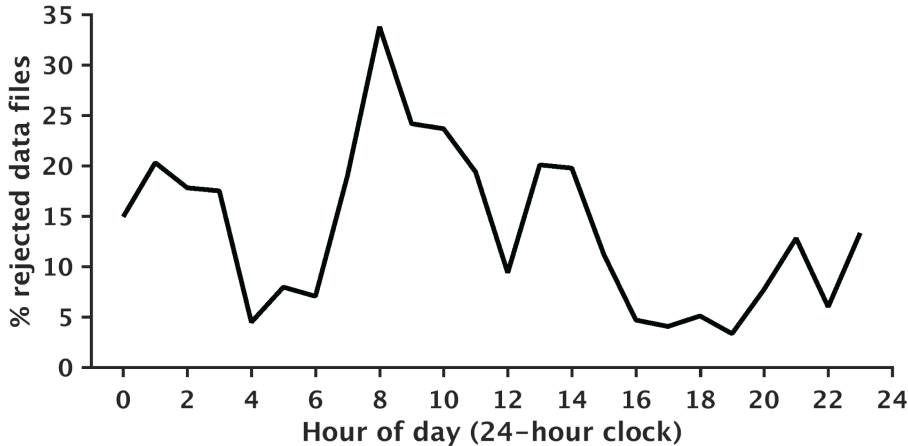

3  
 4 Figure S4. Distributions of hourly data rejection rate. (a) Bar graph illustrating hourly partition between  
 5 the number of accepted and rejected 1-minute noise records. (b) Hourly rejection rates presented by  
 6 percentage with respect to total number of 1-minute noise records within each hour. Number of 1-minute  
 7 noise records within each hour is the cumulative sum computed over the three-week monitoring period.

8

### 9 **Slant stack for dispersion analysis**

10 We use slant stack to transform data from time-offset ( $t-x$ ) domain to frequency-velocity ( $f-V$ )  
 11 domain. Starting from a multichannel shot gather consisted of  $N$  seismic traces  $u(t, x_k)$  (where  $k =$   
 12  $1, 2, \dots, N$  is the trace index), we use the following two steps to transform it into its dispersion spectrum  
 13  $\tilde{U}(f, V)$ :

- 14 • Transform time-domain data into frequency domain via Fourier transform:  $\tilde{u}(f, x_k) =$   
 15  $\int_{-\infty}^{+\infty} u(t, x_k) e^{-i2\pi f t} dt$ .
- 16 • Apply offset-dependent phase shift  $2\pi f x_k/V$  to  $\tilde{u}(f, x_k)$ , and sum over all the offsets of the shot  
 17 gather:  $\tilde{U}(f, V) = \sum_{k=1}^N \tilde{u}(f, x_k) e^{i2\pi f x_k/V}$ .

18 When looping through a range of plausible phase-velocity values, signals that travel with the same  
 19 phase velocity as  $V$  at frequency  $f$  will stack constructively and become part of the spectral peaks in the  
 20 dispersion spectrum.

21

### 22 **Phase-weighted stacking (PWS)**

- 1 PWS includes three steps<sup>2</sup>:
- 2 • Compute instantaneous phase  $\Phi(t) = \tan^{-1}[\frac{H(s(t))}{s(t)}]$  (in radians), where  $s(t)$  is a seismic trace,  $H(s(t))$
- 3 is its Hilbert transform.
- 4 • Compute mean stack (MS) of both the instantaneous phases  $c(t) = \frac{1}{N} |\sum_{i=1}^N e^{j\Phi_i(t)}|$  and the seismic
- 5 traces  $S^{MS}(t) = \frac{1}{N} \sum_{i=1}^N s_i(t)$ , where  $j$  is the imaginary unit;  $i$  is the trace index;  $N$  is the total stack
- 6 count.
- 7 • Apply phase stack  $c(t)$  as a weighting factor to the trace stack:  $S^{PWS}(t) = c^v(t)S^{MS}(t)$ , where  $v$  is a
- 8 power term. Larger  $v$  leads to more severe influences from the phase weighting factor ( $v = 1$  in our
- 9 case).

10 The weighting factor  $c(t)$  is a coherency measure that varies between 0 and 1. When signals are out

11 of phase (incoherent),  $c(t)$  is close to 0, causing the corresponding samples in the trace stack to be

12 suppressed. By suppressing incoherent signals, PWS achieves an improved SNR with shorter stacking

13 periods.

14

## 15 Spectral root-mean-square deviation (RMSD) computation

16 To assess the difference between two dispersion spectra, we compute spectral RMSD using

17 Equation S2:

$$18 \quad RMSD = \sqrt{\frac{\sum_{i=1}^{N_f} \sum_{j=1}^{N_V} (S_{ij}^{(2)} - S_{ij}^{(1)})^2}{N_f N_V}} \quad (S2)$$

19

20 where subscript  $i$  denotes frequency sampling; subscript  $j$  denotes velocity sampling;  $N_f$  is the total

21 number of frequency points;  $N_V$  is the total number of velocity points;  $S_{ij}^{(1)}$  and  $S_{ij}^{(2)}$  denote the two

22 dispersion spectra under comparison.

23

## 24 Model configuration for the inversion

25 For the inversion, we use a 1D layer-cake model consisting of four layers. Because surface waves

26 are primarily sensitive to shear-wave velocities ( $V_S$ ), we reduce the number of variables in the inversion by

27 using fixed P- to S-wave velocity ratio ( $V_P/V_S = 1.87$ ,  $\rho = 2000 \text{ kg/m}^3$ ). Layer

28 thickness  $h$  and shear-wave velocity  $V_S$  of each layer are the variables, which leaves a total number of seven

29 variables to be solved by the inversion ( $h_1, V_{S1}; h_2, V_{S2}; h_3, V_{S3}; V_{S4}$ ). Upper and lower bounds used in the

30 Monte Carlo sampling are shown in Table S1. To further reduce computation time, only normally dispersive

31 models (velocities increase with increasing depths) from the sample pool are used in the inversion. This

32 yields  $\sim 0.55$  million normally dispersive models, which take up about 37% of the entire sample pool.

33

34 Table S1. Upper and lower bounds in Monte Carlo sampling of the inversion variables.

| Layer index | $V_{Smin}$ (m/s) | $V_{Smax}$ (m/s) | $h_{min}$ (m) | $h_{max}$ (m) |
|-------------|------------------|------------------|---------------|---------------|
| 1           | 150              | 250              | 1             | 20            |
| 2           | 200              | 1000             | 5             | 20            |
| 3           | 600              | 1200             | 5             | 20            |
| 4           | 600              | 1200             | -             | -             |

35

36

## 37 $V_{S30}$ calculation and site classification

38  $V_{S30}$  is the travel-time average of the shear-wave velocity over the top 30 meters. It is computed via

39 Equation S3:

1 
$$V_{S30} = \frac{30}{\sum_i t_i} = \frac{30}{\sum_i \frac{h_i}{v_{Si}}} \quad (S3)$$

2  
3 where  $i$  denotes layer index included in the top 30 meters;  $h$  denotes layer thickness;  $t$  denotes one-  
4 way travel time.

5 Table S2 shows site-condition classes used in building-codes regulations (IBC 2006) and their  
6 corresponding  $V_{S30}$  ranges. Our estimated  $V_{S30}$  range of 284.2–314.1 m/s places the field site in class D (stiff  
7 soil), which is consistent with the classification provided by earlier studies<sup>3,4</sup>.

8  
9 Table S2. IBC\* (2006) site classification with  $v_{S30}$  as site<sup>3,4</sup>-condition indicator.

| Site class | Soil type description         | $V_{S30}$ range (m/s) |
|------------|-------------------------------|-----------------------|
| A          | Hard rock                     | >1500                 |
| B          | Rock                          | 760–1500              |
| C          | Very dense soil and soft rock | 360–760               |
| D          | Stiff soil                    | 180–360               |
| E          | Soft soil                     | <180                  |

10 \*IBC = the International Building Codes.

11  
12 **References**

13 1 Kuvshinov, B. N. Interaction of helically wound fibre-optic cables with plane seismic waves.  
14 *Geophysical Prospecting* **64**, 671-688, doi:10.1111/1365-2478.12303 (2016).  
15 2 Schimmel, M. & Paulssen, H. Noise reduction and detection of weak, coherent signals through  
16 phase-weighted stacks. *Geophysical Journal International* **130**, 497-505, doi:10.1111/j.1365-  
17 246X.1997.tb05664.x (1997).  
18 3 Wills, C. J. *et al.* A site-conditions map for California based on geology and shear-wave velocity.  
19 *Bulletin of the Seismological Society of America* **90**, S187-S208, doi:10.1785/0120000503  
20 (2000).  
21 4 Wald, D. J. & Allen, T. I. Topographic slope as a proxy for seismic site conditions and  
22 amplification. *Bulletin of the Seismological Society of America* **97**, 1379-1395,  
23 doi:10.1785/0120060267 (2007).  
24
